# Supplementary material for: Haunting the Ganges: addressing the issues of ghost gear in the Ganga River through an incentive-based institutional mechanism
Source: Frontiers journal article supplement (doi:10.3389/fcosc.2024.1341434), 2024-09-23
Supplement: Data_Sheet_1.pdf [file Data_Sheet_1.pdf]

**Table S1: Inland fisheries resources in the states along the Ganga River in the year 2020-21.**

| State         | Rivers & Canals (km) | Small reservoirs |            | Medium & large reservoirs |              | Tanks & Ponds (ha) | Brackish water (ha) | Beels/ Oxbow lakes/ Derelict water (ha) | Other      |
|---------------|----------------------|------------------|------------|---------------------------|--------------|--------------------|---------------------|-----------------------------------------|------------|
|               |                      | No.              | Area (ha)  | No.                       | Area (ha)    |                    |                     |                                         |            |
| Uttarakhand   | 2,686                | 0                | 0          | 7                         | 20,587       | 879.79             | 0                   | 0                                       | 50         |
| Uttar Pradesh | 39,545.13            | 53               | 12,899.59  | 29                        | 132,655      | 172,859            | 0                   | 12,034.15                               | 0          |
| Bihar         | 21,300               | 0                | 0          | 37                        | 26,304       | 93,218             | 0                   | 9,50,000                                | 0          |
| Jharkhand     | 1,800                | 412              | 28,789.6   | 23                        | 104,363      | 79,010             | 0                   | 0                                       | 19,936     |
| West Bengal   | 2,526                | 52               | 28,050     | 0                         | 0            | 263,372            | 210,000             | 42,082                                  | 26,925     |
| Total         | 67857.13             | 517              | 69739.19   | 96                        | 283909       | 609338.79          | 210000              | 1004116.15                              | 46911      |
| India         | 280,751.115          | 12906            | 754,832.81 | 504                       | 2,045,250.46 | 2,448,368.61       | 1,066,968.96        | 1,355,060.33                            | 920,390.71 |

Source: Fisheries Statistics Division, 2023.

**Table S2: National legislations governing discarded plastic fishing nets**

| Ministry                                           | Policy or legislative tool                            | Focus                       | Provision of reduction or minimizing plastic pollution | Provision for addressing ALDFG | Ways to Reduce /Minimize Pollution                                                                                                                                       | Plastic Pollution with respect to Aquatic Species/ Water Quality                    | Recycle Plastic | Buy Back/Subsidies / Circular economy |
|----------------------------------------------------|-------------------------------------------------------|-----------------------------|--------------------------------------------------------|--------------------------------|--------------------------------------------------------------------------------------------------------------------------------------------------------------------------|-------------------------------------------------------------------------------------|-----------------|---------------------------------------|
| Constitution of India, 1950                        |                                                       | Conservation and Regulation | No                                                     | No                             | Art.21 Right to life include pollution free environment.                                                                                                                 | Art.21 Right to life include pollution free environment.                            | No              | No                                    |
| Ministry of Law and Justice                        | Indian Penal Code, 1860                               | Regulation                  | No                                                     | No                             | Sec.277 Fouling water of public spring or reservoir.                                                                                                                     | No                                                                                  | No              | No                                    |
| Ministry of Environment, Forest and Climate Change | Water (Prevention and Control of Pollution) Act, 1974 | Regulation                  | Yes                                                    | No                             | Sec. 25. Restrictions on new outlets and new discharges in water bodies.<br>Sec. 26. Provision regarding existing discharge of sewage or trade effluent in water bodies. | Sec. 24 Prohibition on use of stream or well for disposal of polluting matter, etc. | No              | No                                    |

|                                                      |                                                  |                             |     |     |                                                                                                                                                  |                                                                                        |                                               |                                                |
|------------------------------------------------------|--------------------------------------------------|-----------------------------|-----|-----|--------------------------------------------------------------------------------------------------------------------------------------------------|----------------------------------------------------------------------------------------|-----------------------------------------------|------------------------------------------------|
|                                                      | Environment (Protection) Act, 1986               | Conservation and Regulation | No  | No  | Sec. 7. Persons carrying on industry, operation, etc., not to allow emission or discharge of environmental pollutants in excess of the standards | Sec. 3 Power of Central Government to take measures to protect and improve environment | No                                            | No                                             |
|                                                      | Plastic Waste Management Rules, 2016             | Regulation                  | Yes | No  | Sec. 5 (b) Use of plastic waste which cannot be further recycled for road construction.                                                          | No                                                                                     | SEC. 5 (a) plastic waste, should be recycled. | Sec. 9 Extended Producer Responsibility (EPR). |
|                                                      | Plastic Waste Management (Amendment) Rules, 2022 | Regulation                  | Yes | No  | Sec. 9. Imposition of environmental compensation.                                                                                                | No                                                                                     | Sec. 7(b) Obligation for recycling.           | Sec. 7 Extended Producer Responsibility (EPR)  |
| Ministry of Fisheries, Animal Husbandry and Dairying | National Fisheries Policy, 2020                  | Ecological and economic     | Yes | Yes | Yes                                                                                                                                              | Yes                                                                                    | Yes                                           | Yes                                            |
|                                                      | Indian Fisheries act, 1897                       | Regulation                  | No  | No  | Sec. 6 Prohibit fixed engines or nets erected or used in contravention of the rule.                                                              | Sec. 4 & 5. Prohibit destruction of fish by explosives & poisoning waters.             | No                                            | No                                             |

**Table S3: States legislations governing discarded plastic fishing nets along the Ganga River**

| Governance level | Ministry                | Policy or legislative tool                  | Focus                                    | Provision of reduction or minimizin g plastic pollution | Provision for addressing the issue of ALDFG | Ways to Reduce /Minimize Pollution                                          | Plastic Pollution w.r.t Aquatic Species/ Water Quality                                                    | Recycle Plastic | Buy Back/Sub sidies/ Circular economy |
|------------------|-------------------------|---------------------------------------------|------------------------------------------|---------------------------------------------------------|---------------------------------------------|-----------------------------------------------------------------------------|-----------------------------------------------------------------------------------------------------------|-----------------|---------------------------------------|
| Uttarakhand      | Department of Fisheries | The Uttarakhand Fisheries Act, 2003         | Economic and Regulation                  | No                                                      | No                                          | Sec. 3(3)(c) Prohibit pollution of waters by trade effluents.               | Sec. 6 & 7. Prohibit destruction of fish by explosives & poisoning waters.                                | No              | No                                    |
| Uttar Pradesh    | Fisheries Department    | The U.P. Fisheries Act, 1948                | Protection, Conservation and Development | No                                                      | No                                          | Sec.3(3)(b)Prohibit using any substance likely to cause pollution of water. | Sec.3(3)(b)Prohibit destruction of fish by explosive substance or poisoning.                              | No              | No                                    |
| Bihar            | Department of Fisheries | The Bihar Fish Jalkar Management Act, 2006. | Development and Regulation               | No                                                      | No                                          | No                                                                          | Sec. 13(v) Use of dynamite or explosives, poison and poisonous chemicals for fishing shall be prohibited. | No              | No                                    |
| Jharkhand        |                         | No Act enacted                              | No Act enacted                           | No Act enacted                                          | No Act enacted                              | No Act enacted                                                              | No Act enacted                                                                                            | No Act enacte d | No Act enacted                        |

|             |                         |                                            |                                                    |    |    |                                                                                                                                               |                                                                         |    |    |
|-------------|-------------------------|--------------------------------------------|----------------------------------------------------|----|----|-----------------------------------------------------------------------------------------------------------------------------------------------|-------------------------------------------------------------------------|----|----|
| West Bengal | Department of Fisheries | The West Bengal Inland Fisheries Act, 1984 | Conservation, development, propagation, protection | No | No | Sec. 6 No person shall discharge into any flowing water or any confined water area any industrial waste, sewage or other polluting substance. | Sec.5 Prohibit destruction of fish by explosive substance or poisoning. | No | No |
|-------------|-------------------------|--------------------------------------------|----------------------------------------------------|----|----|-----------------------------------------------------------------------------------------------------------------------------------------------|-------------------------------------------------------------------------|----|----|

## References

- Government of India. (1860). Indian Penal Code. Retrieved from <https://www.indiacode.nic.in/bitstream/123456789/4219/1/THE-INDIAN-PENAL-CODE-1860.pdf>. Accessed on November 15, 2023.
- Government of India. (1897). Indian Fisheries Act. Retrieved from [https://www.indiacode.nic.in/repealed-act/repealed\\_act\\_documents/A1897-4.pdf](https://www.indiacode.nic.in/repealed-act/repealed_act_documents/A1897-4.pdf). Accessed on November 15, 2023.
- Government of India. (1950). Constitution of India. Retrieved from [https://www.indiacode.nic.in/bitstream/123456789/15240/1/constitution\\_of\\_india.pdf](https://www.indiacode.nic.in/bitstream/123456789/15240/1/constitution_of_india.pdf). Accessed on November 15, 2023.
- Government of India. (1974). Water (Prevention and Control of Pollution) Act. Retrieved from <https://ddashboard.legislative.gov.in/actsofparliamentfromtheyear/water-prevention-and-control-pollution-act-1974>. Accessed on November 15, 2023.
- Government of India. (1986). Environment (Protection) Act. Retrieved from <https://ddashboard.legislative.gov.in/actsofparliamentfromtheyear/environment-protection-act-1986>. Accessed on November 15, 2023.
- Government of India. (2016). Plastic Waste Management Rules. Retrieved from <https://cpcb.nic.in/rules-4/>. Accessed on November 15, 2023.
- Government of India. (2020). National Fisheries Policy. Retrieved from [https://dof.gov.in/sites/default/files/2020-12/Policy\\_0.pdf](https://dof.gov.in/sites/default/files/2020-12/Policy_0.pdf). Accessed on November 15, 2023.
- Government of India. (2022). Plastic Waste Management (Amendment) Rules. Retrieved from <https://cpcb.nic.in/uploads/plasticwaste/2-amendment-pwmrules-2022.pdf>. Accessed on November 15, 2023.
- Government of Uttar Pradesh. (1948). The U.P. Fisheries Act. Retrieved from <https://www.indiacode.nic.in/bitstream/123456789/17107/1/fishriesactfinal1.pdf>. Accessed on November 15, 2023.
- Government of Uttarakhand. (2003). The Uttarakhand Fisheries Act. Retrieved from [https://fisheries.uk.gov.in/files/Acts/Fisheries\\_Act.pdf](https://fisheries.uk.gov.in/files/Acts/Fisheries_Act.pdf). Accessed on November 15, 2023.
- Government of West Bengal. (1984). The West Bengal Inland Fisheries Act. Retrieved from <https://www.indiacode.nic.in/bitstream/123456789/14470/1/1984-25.pdf>. Accessed on November 15, 2023.
